# Supplementary material
Source: Springer Nature journal article supplement (https://www.springermedizin.de/resource/supplementary/10194_2012_264_MOESM5_ESM.pdf/9422564)

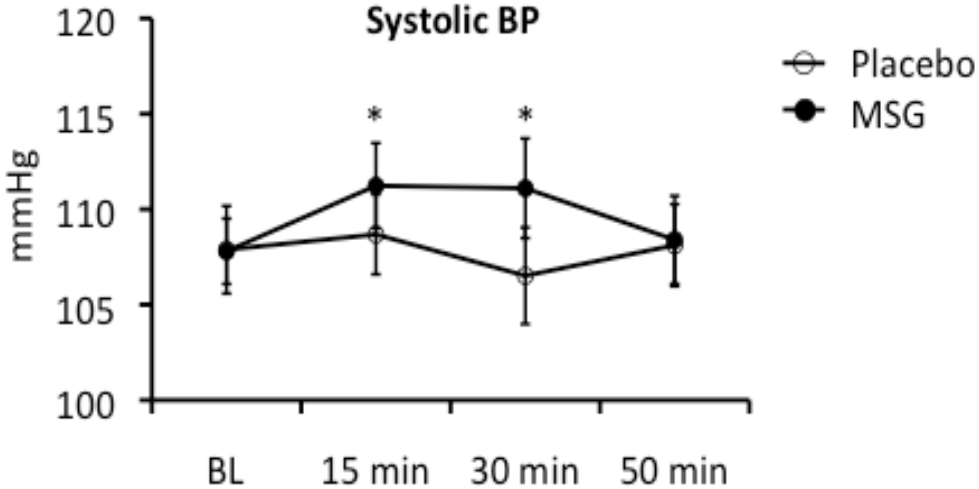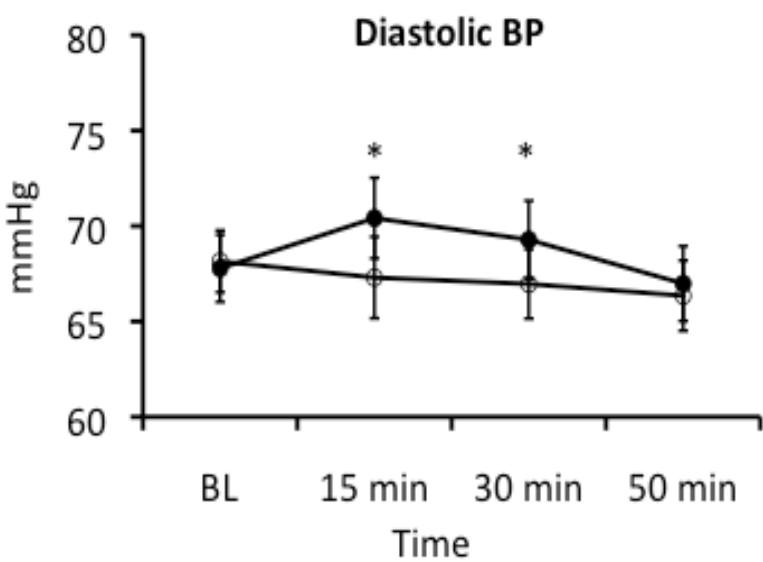

Supplement: MOESM5 [file 9422564]
